# Supplementary material for: Carbon nitride nanosheets as visible light photocatalytic initiators and crosslinkers for hydrogels with thermoresponsive turbidity
Source: Royal Society of Chemistry journal article supplement (doi:10.1039/c7ta02923c), 2017-01-01
Supplement: c7ta02923c1.pdf [file c7ta02923c1.pdf]

## Supporting Information (SI)

### **Carbon nitride nanosheets as visible light photocatalytic initiator and crosslinkers for hydrogels with thermoresponsive turbidity**

*Jian Liu,<sup>\*a</sup> Tong An,<sup>b</sup> Zhihan Chen,<sup>b</sup> Zizhao Wang,<sup>b</sup> Han Zhou,<sup>\*b</sup> Tongxiang Fan,<sup>b</sup> Di Zhang,<sup>b</sup> and Markus Antonietti<sup>\*c</sup>*

<sup>a</sup>Department of Chemistry, Northwestern University, Evanston 60208, USA. E-mail: [liujian@iccas.ac.cn](mailto:liujian@iccas.ac.cn)

<sup>b</sup>State Key Lab of metal matrix composites, Shanghai Jiaotong University, Shanghai, 200240, P.R. China. E-mail: [hanzhou\\_81@sjtu.edu.cn](mailto:hanzhou_81@sjtu.edu.cn)

<sup>c</sup>Department of Colloid Chemistry, Max Planck Institute of Colloids and Interfaces, Potsdam 14424, Germany. E-mail: [markus.antonietti@mpikg.mpg.de](mailto:markus.antonietti@mpikg.mpg.de)

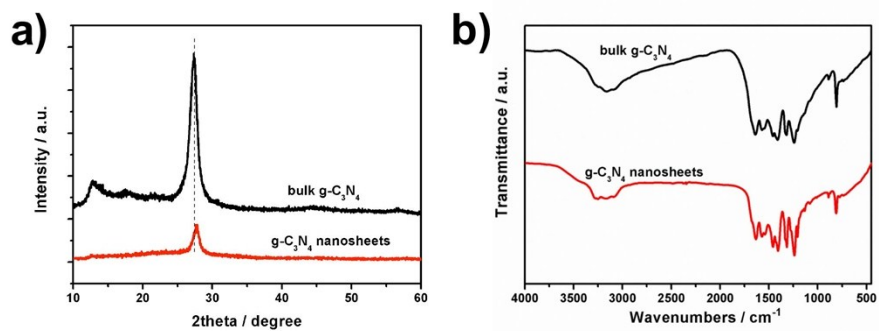

Figure S1. XRD, FTIR characterizations of CNS and bulky g-C<sub>3</sub>N<sub>4</sub>, respectively.

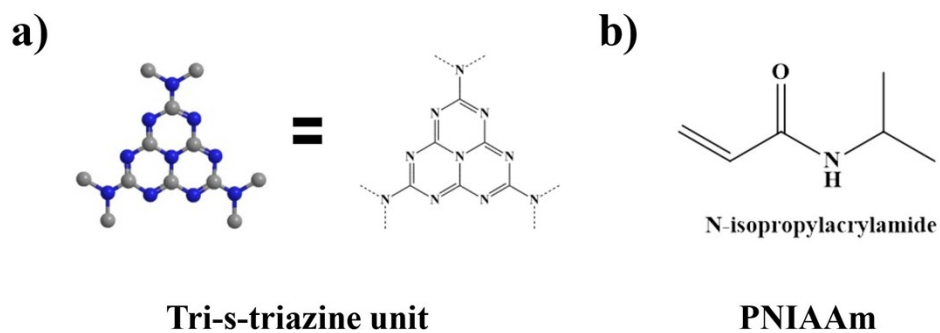

Figure S2. (c) Molecular structure of tri-s-triazine (C<sub>6</sub>N<sub>7</sub>) as building block of g-C<sub>3</sub>N<sub>4</sub>.

## Monomer concentration

8wt%、 10wt%、 12wt%

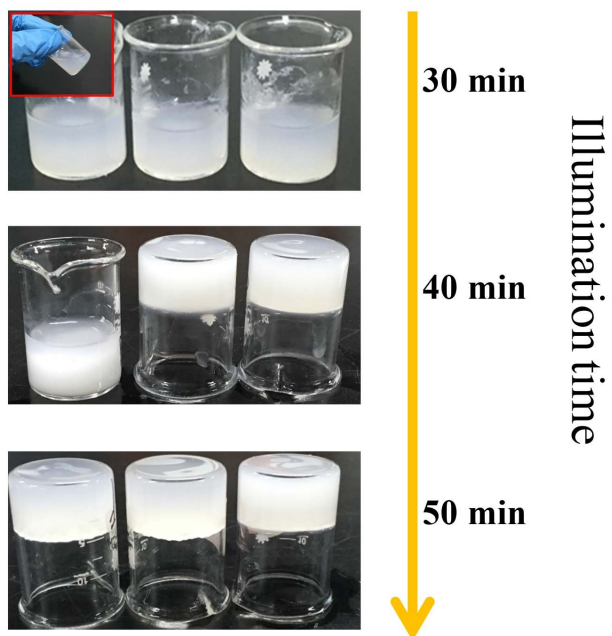

Figure S3. The investigation between the NIPAm monomer concentration and the irradiation time required to achieve the gelation under UV light irradiation.

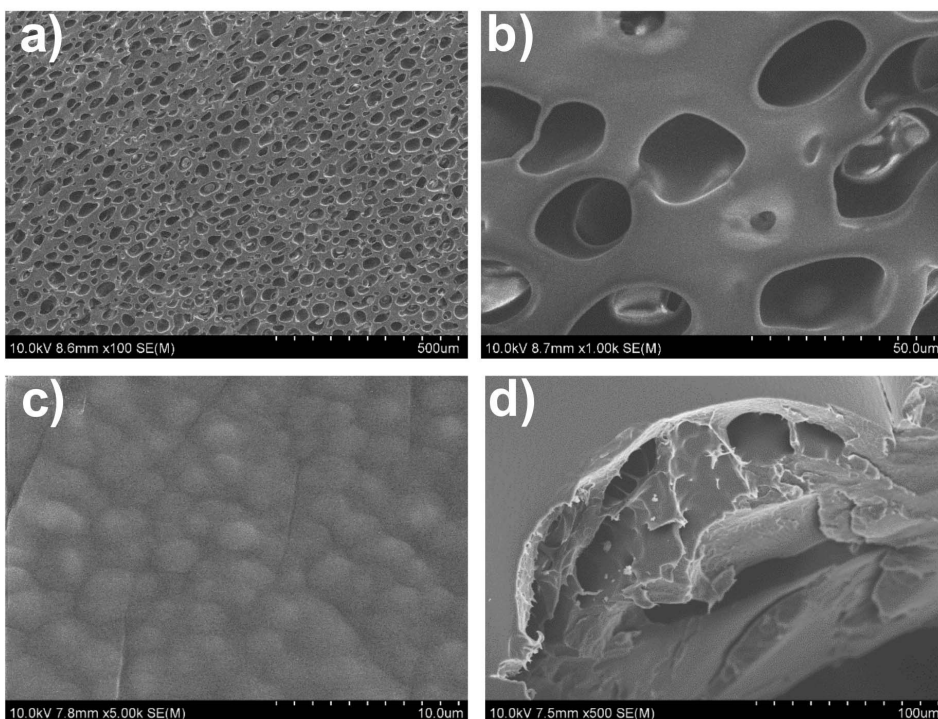

Figure S4. The SEM images of PNIPAm/CNS after supercritical CO<sub>2</sub> drying (a, b). SEM images of the PNIPAm/CNS after freeze drying (c, d).

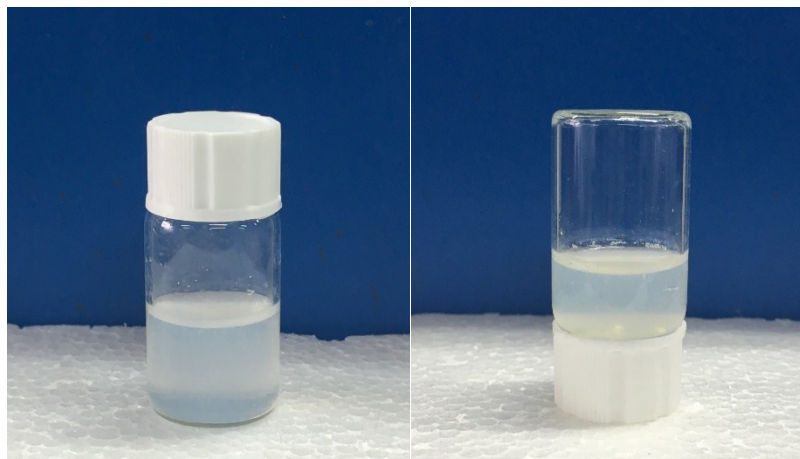

Figure S5. CNS containing NIPAm solution before heating (left) and after heating (right).

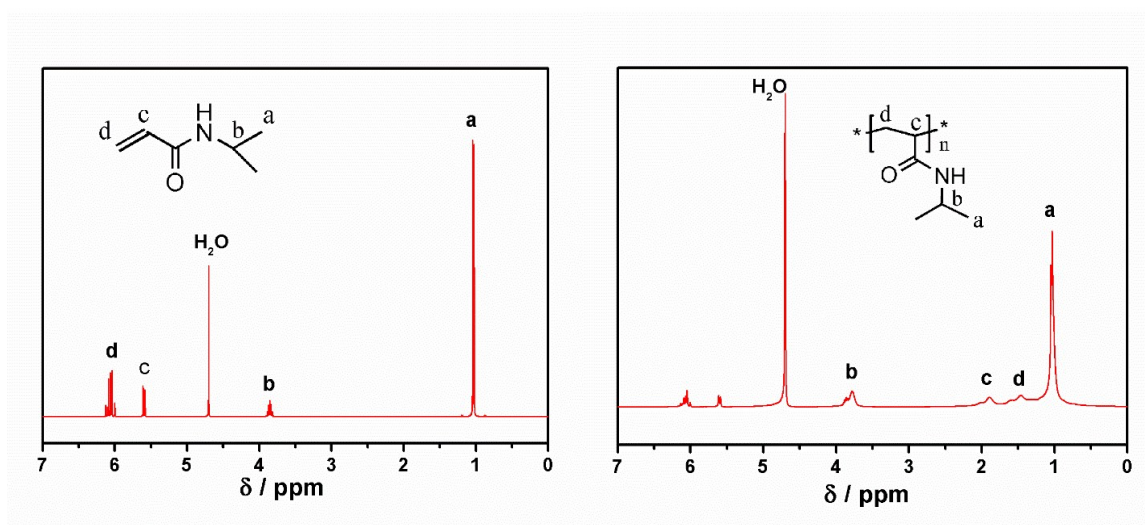

Figure S6.  $^1\text{H}$  NMR spectra of NIPAm (left) and PNIPAm (right)
